# Supplementary material for: Artemisinins as potential anticancer agents: uptake detection in erythrocytes using Fourier transform infrared spectroscopy and cytotoxicity against bladder cancer cells
Source: HighWire-hosted journal article supplement (doi:10.1136/jclinpath-2016-203721), 2016-05-06
Supplement: jclinpath-2016-203721supp_abstract_in_Arabic.pdf [file jclinpath-2016-203721supp_abstract_in_Arabic.pdf]

# الارتيميسينات كعامل محتمل مضاد للسرطان: تحري الامتصاص في الكريات الحمراء باستخدام مطيافية تحويل فورييه للأشعة تحت الحمراء والسمية الخلوية ضد خلايا سرطان المثانة

## الخلاصة:

**الأهداف:** يمكن للمشتقات نصف الصناعية من عقارات الارتيميسينات المضادة للملاريا ان تمتلك خواصاً مضادة للسرطان. إن القدرة على كشف وتتبع امتصاص و توزيع الارتيميسين في الخلايا يمكن ان يسهل عملية تصوير الخلايا الحية دون الحاجة الى وسماها. تقوم هذه الدراسة بوصف طيف الامتصاص متوسط النطاق للأشعة تحت الحمراء لثلاث ارتيميسينات مختلفة وتحاول كشف وجودها في نموذج خلوي بسيط (الكريات الحمراء). تم استخدام تجارب السمية الخلوية لتقييم الخواص المحتملة المضادة للسرطان تجاه خلايا سرطان المثانة.

**المنهجية أو الطريقة:** تم الحصول على أطيف فورييه متوسطة النطاق للأشعة تحت الحمراء من التحضيرات الجافة لدي هيدرو ارتيميسين (DHA) ارتيسونات (ART) و ارتيميسين (ARTE). تم تحضير الكريات الحمراء من الدم الطبيعي وتحضيرها عند الدرجة 37م لمدة 30 دقيقة ساعة مع المشتقات الثلاثة للارتيميسينات. تم تحضير السيتوسين على صفيحة الومنيوم من أجل التحليل الطيفي. تم تقييم إمكانية تثبيط نمو خلايا سرطان المثانة الخلوي من نمط RT112 من قبل مركب (4,5)-3 the Dimethylthiazol-2-yl)-2,5-Diphenyltetrazolium Bromide بطريقة الكتلة الحيوية المتبقية.

**النتائج:** تم الحصول على الاطيف من المركبات الثلاثة الاصلية. إعادة الاختبارات بعد 8 أسابيع أظهرت أن كل من ART و ARET بقيت مستقرة (ثابتة) عند حفظها وفقاً لتعليمات المصنع. أبدى مركب DHA تغيرات واضحة خلال نفس المدة. كان من الممكن كشف DHA في السيتوسينات عن طريق طيف الطرح ولكن هذا لم يكن ممكناً لكل من المركبين الآخرين ART و ARET. كان التوافق بين طيف الطرح وطيف المركب الأصلي أكبر من 80%. أظهر كل من DHA و ART امكانيه سمية خلوية قوية تجاه خلايا RT112.

**الختامة:** تبدي مشتقات الارتيميسين التي تم اختبارها طيف امتصاص فريد في النطاق المتوسط لامتصاص الأشعة تحت الحمراء والذي يمكن استخدامه لمراقبة التفكك وبالنسبة لـ DHA فيمكن كشفه بالطرح في الكريات الحمراء مما يتيح إمكانية إجراء دراسات تصويرية مستقبلاً. إن فعاليته السمية الخلوية تجاه خلايا RT112 تقترح إمكانية التطبيق على سرطان المثانة كمرض مستهدف.

**الكلمات المفتاحية:** ارتيميسينين، العوامل المضادة للسرطان، تحويل فورييه للأشعة تحت الحمراء، الكريات الحمراء، السمية الخلوية، سرطان المثانة.

# Artemisinin as Potential Anticancer Agents: Uptake Detection in Erythrocytes Using Fourier Transform Infrared Spectroscopy and Cytotoxicity against Bladder Cancer Cells

## ABSTRACT

**Aims** Semi-synthetic derivatives of the anti-malarial drug artemisinin may also possess anti-cancer properties. The ability to detect artemisinin uptake and distribution in cells would facilitate live cell imaging without labelling. This study describes mid-range infrared absorption spectra for three artemisinin variants and attempts to detect their presence in a simple cell model (erythrocytes). Cytotoxicity assays assess potential anti-cancer properties against bladder cancer cells.

**Methods** Mid-range Fourier transform *infrared* spectra were obtained from dry preparations of Dihydroartemisinin (DHA), Artesunate (ART) and Artemether (ARTE). Erythrocytes were prepared from normal blood and incubated for 30 minutes at 37°C with the three artemisinin derivatives. Cytospin preparations were prepared on aluminium foil for spectroscopy. Potential for growth inhibition in the RT112 bladder carcinoma cell line was assessed by the 3-(4,5-Dimethylthiazol-2-yl)-2,5-Diphenyltetrazolium Bromide residual viable biomass method.

**Results** Spectra were obtained from the three native compounds. Repeat scans after 8 weeks showed ART and ARTE to be stable, stored under manufacturer's recommendations. DHA exhibited marked changes over the same period. It was possible by subtraction to detect DHA in cytopins, but not ART or ARTE. The fit between the subtraction spectrum and that of the native compound was >80%. DHA and ART showed strong cytotoxic potential against RT112 cells.

**Conclusion** The artemisinin derivatives tested exhibit unique mid-range infrared absorption spectra which can be used to monitor degradation and, for DHA, can be detected by subtraction in loaded erythrocytes rendering future imaging studies feasible. Its cytotoxic efficacy against RT112 cells suggest bladder cancer as a possible target disease.

**Key words:** Artemisinin; Anticancer Agents; Fourier Transform Infrared; Erythrocytes; Cytotoxicity; Bladder Cancer
